# Supplementary material for: Base adsorption mechanism over zeolite catalysts at different Al contents probed by the tapered element oscillating microbalance (TEOM)
Source: Royal Society of Chemistry journal article supplement (doi:10.1039/c8cp05001e), 2018-01-01
Supplement: c8cp05001e1.pdf [file c8cp05001e1.pdf]

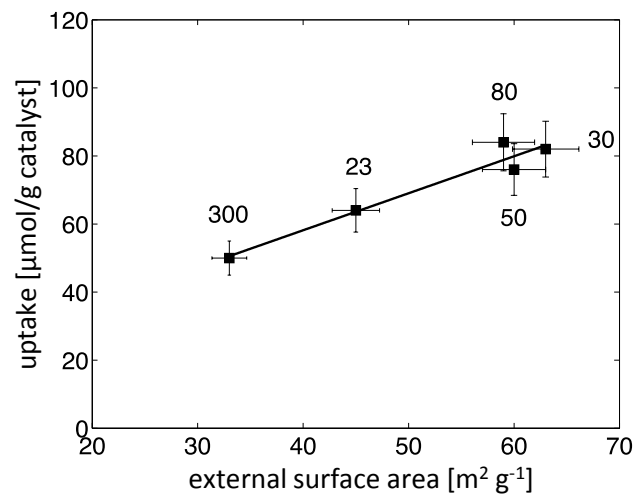

**Figure S1.** Correlation between collidine uptake and external surface area for HZSM5 samples with different SAR values.
